# Supplementary material
Source: PubMed Central journal article supplement (PMC4915990)
Supplement: NIHMS740787-supplement-Supp_Tabel_S1.pdf [file NIHMS740787-supplement-Supp_Tabel_S1.pdf]

## **Prevalence of psoriasis phenotypes among US men and women**

Joseph F. Merola, MD MMSc (1,3), Tricia Li MS (2), Wen-Qing Li PhD (4), Eunyong Cho (2,4, 5), Abrar A. Qureshi MD MPH (2,4, 5)

(1) Harvard Medical School, Department of Dermatology, Brigham and Women's Hospital, Boston, MA

(2) Channing Division of Network Medicine, Department of Medicine Brigham and Women's Hospital, Harvard Medical School, Boston, MA

(3) Harvard Medical School, Department of Medicine, Division of Rheumatology, Brigham and Women's Hospital Boston, MA

(4) Brown University, Department of Dermatology, Alpert School of Medicine, Providence, RI

**Correspondence:** Dr. Merola; Department of Dermatology, Brigham and Women's Hospital, 221 Longwood Ave, Boston, MA 02115 ([jfmerola@partners.org](mailto:jfmerola@partners.org))

### **Supplementary Table 1: Demographics**

|                                   |                                          | NHS(n=1604)  | NHSII(n=1575) | HPFS(n=646)  |
|-----------------------------------|------------------------------------------|--------------|---------------|--------------|
| Ethnicity                         | Black(%)                                 | 0.45         | 0.76          | 0.15         |
|                                   | Hispanic(%)                              | 0.25         | 1.65          | NA           |
|                                   | Asian(%)                                 | 0.51         | 0.70          | 1.24         |
|                                   | Caucasian(%)                             | 98.9         | 97.40         | 92.1         |
| Body Mass Index(BMI) <sup>a</sup> |                                          |              | 44.12         |              |
|                                   | Normal(<25 kg/m <sup>2</sup> , %)        | 70.1         | 61.33         |              |
|                                   | Overweight(25-<30 kg/m <sup>2</sup> , %) | 20.07        | 20.70         | 46.90        |
|                                   | Obese(>=30 kg/m <sup>2</sup> , %)        | 7.73         | 17.08         | 7.89         |
| Smoking                           | Never(%)                                 | 35.79        | 55.75         | 38.39        |
|                                   | Past (%)                                 | 23.63        | 25.97         | 46.75        |
|                                   | Current(%)                               | 40.27        | 18.22         | 10.37        |
| Alcohol                           | g/day (SD)                               | 7.29(11.43)  | 3.67(7.88)    | 12.83(16.66) |
| Exercise                          | Met <sup>b</sup> -hr/week (SD)           | 13.28(18.99) | 24.49(37.86)  | 22.20(29.60) |
| PsA                               |                                          | 13.22        | 21.97         | 11.76        |

<sup>a</sup> The body-mass index is the weight in kilograms divided by the square of the height in meters. <sup>b</sup> MET denotes metabolic equivalent. Met -hours = sum of the average time/week in each activity x MET value of each activity. One MET, the energy spent sitting quietly, is equal to 3.5 ml of oxygen uptake per kilograms of body weight per minute for a 70-kg adult.
